# Bactericidal Type IV Secretion System Homeostasis in *Xanthomonas citri*

William Cenens<sup>1</sup>, Maxuel O. Andrade<sup>2,3</sup> and Chuck S. Farah<sup>1</sup>

**Affiliations:** <sup>1</sup>Departamento de Bioquímica, Instituto de Química, Universidade de São Paulo (USP), São Paulo, SP, Brazil. <sup>2</sup>Citrus Research and Education Center (CREC), Department of Microbiology and Cell Science, University of Florida, Lake Alfred, FL 33850, USA.

<sup>3</sup>Laboratório Nacional de Biociências, Centro Nacional de Pesquisa em Energia e Materiais, R. Giuseppe Máximo Scolfaro 10000, Campinas, SP, 13083-970, Brazil.

**Contact:** [w.cenens@gmail.com](mailto:w.cenens@gmail.com) and [chsfarah@iq.usp.br](mailto:chsfarah@iq.usp.br)

## Abstract

Several *Xanthomonas* species have a type IV secretion system (T4SS) that injects a cocktail of antibacterial proteins into neighbouring Gram-negative bacteria, often leading to rapid lysis upon cell contact. This capability represents an obvious fitness benefit since it can eliminate competition while the liberated contents of the lysed bacteria could provide an increase in the local availability of nutrients. However, the production of this Mega Dalton-sized T4SS, with over a hundred subunits, also imposes a significant metabolic cost. Here we show that the chromosomal *virB* operon, which encodes the entirety of structural genes of the T4SS in *X. citri*, is regulated by the global regulator CsrA. Relieving CsrA repression from the *virB* operon produced a greater number of T4SSs in the cell envelope and an increased efficiency in contact dependent lysis of target cells. However, this was also accompanied by a physiological cost leading to reduced fitness when in co-culture with wild-type *X. citri*. We show that T4SS production is constitutive despite being downregulated by CsrA. Cells subjected to a wide range of rich and poor growth conditions maintain a constant density of T4SSs in the cell envelope and concomitant interbacterial competitiveness. These results show that CsrA provides a constant though partial repression on the *virB* operon, independent of the tested growth conditions, in this way controlling T4SS-related costs while at the same time maintaining *X. citri*'s aggressive posture when confronted by competitors.

32 Key Words: Interbacterial competition, Type IV secretions systems, CsrA, Single-cell  
33 fluorescent microscopy

## 34 Author Summary

35 *Xanthomonas citri* is a member of a family of phytopathogenic bacteria that can cause  
36 substantial losses in crops. At different stages of the infection cycle, these cells will  
37 encounter other bacterial species with whom they will have to compete for space and  
38 nutrients. One mechanism which improves a cell's chance to survive these encounters is a  
39 type IV secretion system that transfers a cocktail of antimicrobial effector proteins into  
40 other Gram-negative bacteria in a contact-dependent manner. Here, we show that this  
41 system is constitutively produced at a low basal level, even during low nutrient conditions,  
42 despite representing a significant metabolic burden to the cell. The conserved global  
43 regulator, CsrA, provides a constant, nutrient-independent, repression on the production  
44 T4SS components, thereby holding production costs to a minimum while at the same time  
45 ensuring *X. citri*'s competitiveness during encounters with bacterial rivals.

## 46 Introduction

47 Type IV secretion systems (T4SS) are large systems spanning both the inner and outer  
48 membrane of many Gram-negative bacterial species (Low et al. 2014). The best described  
49 functions of T4SSs are the delivery of the pTi plasmid of *Agrobacterium tumefaciens*  
50 (Vergunst et al. 2000; Gordon & Christie 2014), their crucial roles in bacterial conjugation  
51 (Ilangovan et al. 2015) and involvement in delivering virulence factors to mammalian cells by  
52 several pathogenic species (Dehio & Tsois 2017). T4SSs are made up of over 100 subunits of  
53 12 different proteins (VirB1 to VirB11 plus VirD4) with a total size of over 3 MDa each (Low  
54 et al. 2014). Maintaining and expressing large operons and producing the amino-acids  
55 required to assemble the proteins they encode present a significant investment in terms of  
56 energy and raw materials for a cell (Akashi & Gojobori 2002; Wagner 2005; Lynch & Marinov  
57 2015). Given the high cost secretion systems would have on cell physiology, it is not  
58 surprising that their production is often restricted to specific conditions, where they will be  
59 most needed. For example, expression of the *Agrobacterium tumefaciens* T4SS is dependent  
60 on pH, monosaccharides, phosphate and specific phenolic compounds released by wounded  
61 plant tissue (Das & Pazour 1989; Lohrke et al. 2001; Winans 1990; Gao & Lynn 2005).

62 Similarly, plasmid-borne *tra* genes, encoding a T4SS and other components of the  
63 conjugation machinery, are only produced during specific conditions and often only in a  
64 small portion of the population (Koraimann & Wagner 2014). Other examples include the  
65 *Brucella suis* T4SS produced inside acidic phagocytic vacuoles of macrophages (Boschiroli et  
66 al. 2002) and the *Ehrlichia ruminantium* T4SS whose genes are induced during iron  
67 starvation (Moumène et al. 2017). This strict environmentally-dependent regulation is also  
68 common in other secretion systems; for example, the *Vibrio cholera* type VI secretion system  
69 (T6SS) is induced during high cell densities on chitinous surfaces (Borgeaud et al. 2015), the  
70 *Xanthomonas citri* T6SS is specifically induced in the presence of amoeba (Bayer-Santos et al.  
71 2018) and the *Shigella flexneri* type III secretion system is tightly regulated by oxygen levels  
72 (Marteyn et al. 2010).

73 *X. citri* is a phytopathogen that causes citrus canker, a disease which can lead to significant  
74 losses in citrus fruit production (Ryan et al. 2011; Mansfield et al. 2012). Previously, our  
75 group has characterized the interbacterial killing activity of a T4SS in *X. citri* and showed that  
76 this strain actively transfers a cocktail of antibacterial effector proteins into neighbouring  
77 Gram-negative cells in a contact-dependent manner (Souza et al. 2015; Sgro et al. 2019).  
78 More recently, we also described the antibacterial killing of a similar T4SS with its unique  
79 antibacterial effectors in the opportunistic pathogen *Stenotrophomonas maltophilia* (Bayer-  
80 Santos et al. 2019). Despite the importance of T4SSs in interbacterial competition, little is  
81 known concerning the regulation of these systems in Xanthomonadaceae.

82 Microarray data of an *X. citri* strain harbouring a mutation in the global regulator CsrA (also  
83 called RsmA) indicated its involvement in the regulation of over a hundred genes, including  
84 the *virB* operon that encodes the T4SS proteins VirB1-11 (Andrade et al. 2014). CsrA is a  
85 pleiotropic regulator linked to the genetic changes during stationary phase growth, biofilm  
86 formation, gluconeogenesis and virulence (Romeo & Babitzke 2018). CsrA acts by binding  
87 specific mRNA loops in 5' untranslated regions containing the canonical 5'-GGA-3' motif (Liu  
88 & Romeo 1997; Holmqvist et al. 2016). In some cases, these interactions stabilize the mRNA  
89 leading to increased expression, as for example has been observed for the *hrpG* mRNA in *X.*  
90 *citri* (Andrade et al. 2014). More often, these CsrA-binding loops encompass the ribosome  
91 binding site, in which case binding of CsrA inhibits translation (Baker et al. 2002). Although  
92 several other means of CsrA regulation exist (Romeo & Babitzke 2018), the majority of

93 interactions lead to a repression of protein production (Potts et al. 2017). CsrA is regulated  
94 by two important small RNAs, CsrB and CsrC (in *E. coli*) or by RsmY and RsmZ (in *P.*  
95 *aeruginosa*), which contain several high affinity CsrA binding loops that effectively titrate  
96 CsrA (Weilbacher et al. 2003; Janssen et al. 2018). Production of these small RNAs in *E. coli* is  
97 controlled by several regulatory pathways, including the BarA/UvrY two-component system  
98 that responds to molecules such as formate and acetate, the catabolite repression pathway  
99 mediated by cAMP-CRP and the stringent response governed by RelA and SpoT-mediated  
100 production of (p)ppGpp (Romeo & Babitzke 2018). Furthermore, direct regulation of CsrA  
101 copy numbers in *E. coli* is achieved by five different promoters using at least two different  
102 sigma factors (Yakhnin et al. 2011).

103 *X. citri* CsrA is very similar to CsrA from *E. coli* and *P. aeruginosa* (>77% identical), albeit the *X.*  
104 *citri* protein has a 9 residue C-terminal extension. Detailed knowledge of CsrA, its targets  
105 and its regulation in Xanthomonas species is limited. For example, the identity or presence  
106 of regulatory small RNAs is not known. Nonetheless, some studies have shown phenotypic  
107 alterations in a CsrA deletion strain reminiscent with known CsrA phenotypes in *E. coli* and *P.*  
108 *aeruginosa*, such as reduced virulence, increased biofilm formation and increased glycogen  
109 production (Chao et al. 2008; Lu et al. 2012) and direct RNA binding studies have also  
110 confirmed the affinity of CsrA in *X. citri* for the canonical 5'-GGA-3' motifs (Andrade et al.  
111 2014).

112 In this work, we show that the CsrA protein of *X. citri* represses the *virB* operon and that  
113 removal of CsrA repression has a measurable fitness cost. This repression is incomplete  
114 however, and so production of the *virB* products continues at a controlled basal level,  
115 maintaining a constant density of T4SSs in the cell envelope during different growth  
116 conditions. We propose that CsrA, in concert with other unidentified regulatory factors  
117 working on the *virB* operon, leads to a sustained and energetically affordable aggressive  
118 posture that contributes to *X. citri* competitiveness and survival.

119

## 120 Results

121 CsrA regulates the *virB* operon by binding to the 5' UTR of *virB7*

122 Based on transcription start site analysis data for *Xanthomonas campestris* (Alkhateeb et al.  
123 2016) and further observations made in the Sequence Read Archive for *X. campestris* and *X.*  
124 *citri* (<https://www.ncbi.nlm.nih.gov/sra>), the *Xanthomonas vir* locus contains two main  
125 transcription start sites (TSSs) (Figure 1a). The presence of these TSSs in *X. citri* was  
126 confirmed by 5'RACE analysis (Supplemental Figure S1). The first TSS is located 303  
127 nucleotides upstream of *virD4* and a second TSS is located 249 nucleotides upstream of the  
128 *virB7* start codon (Figure 1a and Supplemental Figure S1). Both *virD4* and *virB7* contain large  
129 upstream regions, with the upstream region of *virD4* most probably containing an open  
130 reading frame expressing a conserved protein of unknown function. Although an open  
131 reading frame can be detected in the region downstream of *virD4* and upstream of *virB7*  
132 (nucleotide sequence shown in Figure 1a), it lacks a canonical ribosome binding site and its  
133 translated product is of very low sequence complexity and is not conserved in the protein  
134 databases. Since a list of CsrA regulated genes in *X. citri* from a microarray dataset included  
135 several of the *virB* genes (Andrade et al. 2014) we further scrutinised the *virB* 5'UTR  
136 (upstream of the *virB7* start codon, from here on referred to as *5'UTR<sub>B7</sub>*). This analysis  
137 revealed several 5'-GGA-3' CsrA-binding motifs (Figure 1a) that could be CsrA binding sites  
138 when present in a stable loop structure (Holmqvist et al. 2016). To test this hypothesis, a  
139 transcriptional *msfgfp* (encoding for the monomeric super folder green fluorescent protein)  
140 fusion was constructed downstream of the genomic copy of *virB11* (*X. citri virB11-msfgfp*).  
141 Single-cell fluorescence analysis showed that upon deleting *csrA* in *X. citri virB11-msfgfp*,  
142 msfGFP production from the *virB* operon is upregulated 3.3-fold (Figure 1b). In order to  
143 confirm the direct regulation of CsrA on the *5'UTR<sub>B7</sub>*, the *5'UTR<sub>B7</sub>* was cloned in between the  
144  $P_{tac}$  promoter (constitutive in the *lac* negative *X. citri* strain) and *msfgfp*, after which a single  
145 copy of this construct was integrated into the  $\alpha$ -amylase gene (*amy*; *xac0798*) in both the *X.*  
146 *citri* wild-type and  $\Delta csrA$  strain. The resulting fluorescence levels in the presence or absence  
147 of CsrA shows that CsrA is capable of repressing msfGFP production from the  $P_{tac}$  promoter  
148 when the *5'UTR<sub>B7</sub>* is present (Figure 1c). This indicates that the effect of CsrA is independent  
149 of the *virB* promoter. Expanding these observations, we replaced the entire structural  
150 operon (Figure 1a) by *msfgfp*, with the *msfgfp* start codon in the exact position of the *virB7*

151 start codon (*X. citri*  $\Delta virB::P_{B7}\text{-}msfgfp$ ). Deleting *csrA* in this strain indeed showed a similar  
152 response of increased *msfGFP* production from the *virB* operon (Figure 1d). Importantly, the  
153 removal of the  $5'UTR_{B7}$  in this strain (*X. citri*  $\Delta virB::P_{B7}\text{-}\Delta 5'UTR_{B7}\text{-}msfgfp$ ) caused *msfGFP*  
154 levels to increase in the wild-type strain (Figure 1d). This increase in *msfGFP* production in  
155 the absence of  $5'UTR_{B7}$  was only slightly lower than those observed in the *X. citri*  $\Delta virB::P_{B7}\text{-}$   
156 *msfgfp*  $\Delta csrA$  and *X. citri*  $\Delta virB::P_{B7}\text{-}\Delta 5'UTR_{B7}\text{-}msfgfp$   $\Delta csrA$  strains, further confirming *CsrA*  
157 regulation mediated by the  $5'UTR_{B7}$ . We note that the  $\Delta csrA$  background has an elaborate  
158 effect on *X. citri* physiology (for instance, cultures display an intense flocculation and  
159 decreased cell-sizes) and that this could account for the subtle differences in *msfGFP*  
160 production observed between strains lacking *csrA* with or without the  $5'UTR_{B7}$  in Figure 1d.  
161 Next, the construction of a genomic deletion of the  $5'UTR_{B7}$ , while keeping all other *virB*  
162 genes intact, resulted in a 3.9-fold increase in expression levels in the *X. citri*  $\Delta 5'UTR_{B7}$   
163 *virB11-msfgfp* reporter strain (Figure 2a). Finally, an electrophoretic mobility shift assay  
164 (EMSA) confirmed the direct *in vitro* binding of *CsrA* to the  $5'UTR_{B7}$  (Figure 1e). This result,  
165 combined with all the gene expression data obtained from several different constructs  
166 (Figures 1b to 1d and 2a) indicate that *CsrA* regulates *virB* operon expression by binding to  
167 the  $5'UTR_{B7}$ , most probably by preventing translation and/or destabilizing the *virB*  
168 transcripts.

169

170 Removal of CsrA repression on the *virB* operon increases T4SS numbers and bacterial killing.  
171 Having established the direct role of CsrA in the repression of the *virB* operon, we asked  
172 whether the interbacterial killing efficiency of *X. citri* would be enhanced in a strain lacking  
173 the *5'UTR<sub>B7</sub>*. We used a *X. citri virB10-msfgfp<sub>TL</sub>* translational fusion strain (Sgro et al. 2018) in  
174 order to assess the number of T4SSs that are present per cell (see Materials and Methods  
175 and Figure 2b). In this strain, the periplasmic VirB10 component has been replaced by a  
176 VirB10-msfGFP chimera. Since each T4SS contains 14 copies of VirB10, assembled T4SSs can  
177 be observed as fluorescent periplasmic foci and counted (Sgro et al. 2018). Deleting the  
178 *5'UTR<sub>B7</sub>* in the *X. citri virB10-msfgfp<sub>TL</sub>* genetic background resulted in a 2.6-fold increase in  
179 the number of fluorescent T4SS foci that were counted per cell (Figure 2b). We note that the  
180 higher density of T4SSs in this strain leads to a more crowded periplasm, making it more  
181 difficult to clearly separate individual foci, leading to an underestimation of total number of  
182 T4SSs. Therefore, the calculated 2.6-fold increase should be considered a lower limit. As  
183 could be expected, a higher number of T4SSs also increased the efficiency with which *X. citri*  
184 lyses *E. coli* cells in a quantitative LacZ mediated CPRG-cleavage assay (Figure 2c). Using the  
185 slopes of the curves in the CPRG-cleavage assays as a measure of killing efficiency (see  
186 Materials and Methods and (Sgro et al. 2018)), the  $\Delta 5'UTR_{B7}$  strain kills 2.14-fold more  
187 efficiently than the *X. citri* wild-type strain under these conditions (Figure 2c). However,  
188 these results also show that under these conditions, removal of CsrA repression was not  
189 necessary to observe T4SS dependent *E. coli* lysis in the CPRG assays (Figure 2c). This is in  
190 agreement with previously published spot assays and CFU-based competition assays, all  
191 performed with wild type *X. citri* strains (Souza et al. 2015). To test whether we could  
192 identify conditions in which T4SS-mediated killing would be inhibited or enhanced, we  
193 tested *E. coli* lysis efficiencies at 18°C or 28°C, at pH 6, 7 and 8, in absence of Fe<sup>3+</sup> and using  
194 different carbohydrate sources (glucose, sucrose or starch; Figure 2d). All the tested  
195 conditions led to  
196 clearly detectable T4SS dependent lysis of *E. coli* cells with only small variations (+/- 35%) in  
197 killing efficiencies (Figure 2d). Taken together, these observations indicate that the observed  
198 levels of msfGFP signal from the *X. citri virB11-msfgfp* reporter strain (Figure 1b, 1d and 2a)  
199 and the discrete numbers of T4SSs in the cell envelope (Figure 2b) present in the wild-type  
200 background, represent the baseline expression and production levels of T4SS components

201 and that these levels, all repressed from what they would otherwise be in the absence of  
202 CsrA, are sufficient to maintain T4SS production and efficient lysis of neighbouring target  
203 cells.

204

205 T4SS dependent interbacterial killing is maintained during growth under scarce nutrient  
206 conditions

207 Considering the expected high energetic cost of producing T4SSs and the previously  
208 described responsiveness of *csrA* regulons to nutrient input (Romeo & Babitzke 2018), we  
209 decided to test whether lowering the nutrient contents of the growth media would change  
210 T4SS-dependent killing efficiencies. To accomplish this, *X. citri* cultures were passed to media  
211 containing normal or reduced levels of sucrose and/or casamino acids (the only nutrient  
212 sources present in the defined media) and grown overnight plus an additional 9 hours in  
213 fresh media for each culture to fully adapt to the conditions (see Materials and Methods for  
214 details). These cultures were then subjected to a quantitative CPRG-cleavage assay under  
215 standardized conditions. Figure 2e shows that *X. citri* grown in nutrient-scarce culture media  
216 continues to sustain T4SS-dependent lysis of *E. coli* cells. *X. citri* cultures with limited access  
217 to sucrose have slightly reduced killing efficiencies (23% decrease) while cells with limited  
218 access to both casamino acids and sucrose presented slightly elevated (39% increase) killing  
219 efficiencies (Figure 2e). Supplemental Movie S1 presents a time-lapse video of a mixed  
220 culture of *X. citri* and *E. coli* cells growing in casamino acid-depleted media for over 30 hours  
221 in which many events of *E. coli* cell lysis are observed upon contact with *X. citri* cells. For  
222 comparison, Supplemental Movie S2 presents *X. citri* killing *E. coli* cells growing under  
223 standard nutrient concentrations and also shows clear cell lysis upon contact with *X. citri*  
224 cells. No *E. coli* lysis is observed in these experiments when T4SS-deficient *X. citri* strains are  
225 employed ((Souza et al. 2015) and data not shown).

226

227

228



229 Constant but incomplete CsrA-mediated repression of the *virB* operon during different  
230 growth conditions

231 Figures 2a and 2b, showed that removing the *5'UTR<sub>B7</sub>* leads to both increased *msfGFP*  
232 production and T4SS assembly. In order to test how CsrA regulation impacts protein  
233 production from the *virB* operon, we decided to look more closely at VirB production in the  
234 presence and absence of the *5'UTR<sub>B7</sub>* under different growth conditions. To do this, we  
235 began by comparing cytoplasmic *msfGFP* production from *X. citri virB11-msfgfp* and *X. citri*  
236 *Δ5'UTR<sub>B7</sub> virB11-msfgfp* strains. Both strains were grown simultaneously in media with  
237 sucrose, glucose, glycerol or starch as carbohydrate sources or in media depleted for  
238 casamino acids and/or sucrose. Cultures were grown overnight in the different media and  
239 after diluting, grown for an additional 6 hours and *msfGFP* content was registered by  
240 fluorescence microscopy.

241 Mean *msfGFP* production from the *X. citri virB11-msfgfp* strain remains fairly similar during  
242 different inputs of carbohydrates and even in the absence of a carbohydrate source (Figure  
243 3a; white boxplots). Reducing casamino acid concentrations, however, increases VirB  
244 production 60% on average (both in combination with 0.2% or 0.01% sucrose). This increase  
245 in expression levels seems to be independent of CsrA regulation since similar increases in  
246 *msfGFP* production were detected when using the *X. citri Δ5'UTR<sub>B7</sub> virB11-msfgfp* strain  
247 (Figure 3a, dark grey boxplots). In fact, when comparing the relative increases observed with  
248 the removal of the *5'UTR<sub>B7</sub>*, it appears that repression on the *5'UTR<sub>B7</sub>* leads to a reduction of  
249 VirB protein production by, on average 3.8-fold ( $\pm 0.4$ ) over all conditions tested for both  
250 strains (Figure 3a, fold-changes are indicated above each pair of boxplots). As such, it  
251 appears that CsrA represses the *virB* operon to an extent that is largely independent of the  
252 carbohydrate source or casamino acid availability.

253 Homeostasis of T4SS density in the cell envelope over a wide range of nutrient availability  
254 Spurred by the increased expression of the *virB* operon during decreased inputs of casamino  
255 acids, we set out to assess the number of assembled T4SS over a wide range of casamino  
256 acid and sucrose concentrations. For this, an 8 by 8 matrix of wells containing defined media  
257 with varying nutrient levels was created in a 96-well plate. With sucrose (rows) and  
258 casamino acids (columns) ranging from 0.4% to 0.007% in a 1.8x dilution series. After 24  
259 hours of growth and an additional 5 hours of growth after a 4-fold dilution in the same but

260 fresh media, *X. citri virB10-msfgfp<sub>TL</sub>* cells were sampled and immediately imaged by  
261 fluorescence microscopy, registering both cell dimensions and the number of T4SS foci  
262 present per cell. In total, 42 different conditions (Figure 3b inset) were sampled over two  
263 separate experiments). Figures 3b and 3c show that the different nutritional inputs in each  
264 well result in a range of cell sizes, represented by their average surface areas and reveal a  
265 general trend of reduced cell size with reduced casamino acid or sucrose availability. Plotting  
266 the number of T4SSs versus the surface area shows a linear increase in T4SS numbers with  
267 increasing surface area (Figure 3d; Pearson correlation  $r = 0.34$ , as calculated for all data  
268 points). However, this positive correlation in turn leads to an almost constant average T4SS  
269 density (T4SS/surface area) in the cell envelope with a subtle increase observed for the  
270 smallest cells (Figure 3d inset), in line with the observation of subtly increased msfGFP  
271 production in the *X. citri virB11-msfGFP* transcriptional reporter at low casamino acid  
272 concentrations (Figure 3a). These results also suggest that during the cell-cycle, when the  
273 surface area gradually increases until cell division, T4SSs are added continuously. Therefore,  
274 it seems that a *X. citri* population maintains the density of its T4SSs within a specific range  
275 under a variety of nutritional conditions. The number of T4SSs relative to surface area (T4SS  
276 density) could be an important factor in determining the probability that a *X. citri* cell is able  
277 to successfully transfer effectors into a neighbouring target cell during interbacterial  
278 competition.

279

280 T4SS overproduction in a  $\Delta 5'UTR_{B7}$  background has an impact on *X. citri* physiology and leads  
281 to reduced growth speeds

282 Since  $\Delta 5'UTR_{B7}$  cells present a roughly 4-fold greater expression from the *virB* operon  
283 (Figure 3a) and kills with approximately twice the efficiency as wild-type cells (Fig. 2c), we  
284 asked whether this putative advantageous feature could be counter-balanced by the  
285 inherent metabolic cost of T4SS production. We therefore set up a co-culture experiment to  
286 test whether overproduction of T4SSs in the  $\Delta 5'UTR_{B7}$  background leads to a detectable  
287 growth defect in *X. citri*. For this we took advantage of the difference in *msfGFP* production  
288 levels between *X. citri virB11-msfgfp* and *X. citri  $\Delta 5'UTR_{B7}$  virB11-msfgfp* (Figures 2a and 3a)  
289 to sort wild type and overproduction cells by fluorescence microscopy. This mitigated the  
290 need to introduce different antibiotic resistance markers in the genome that could on their  
291 own lead to subtle physiological differences. Additionally, the strains used here are  
292 genetically very closely related since they were obtained from the same recombination  
293 events leading to either the wild-type or mutant  $5'UTR_{B7}$  allele (see Materials and Methods).  
294 Separate cultures of different single colonies of each of the strains were synchronised in rich  
295 AB media before being mixed and diluted in a 1:1 ratio into AB media supplemented with  
296 0.2% sucrose and 0.01% casamino acids. Cultures were diluted regularly to avoid saturation  
297 and fluorescence microscopy images of thousands of cells were obtained at different time-  
298 points over a period of approximately one week. Figure 4a shows that the  $\Delta 5'UTR_{B7}$  strain  
299 gets outpaced by the wild type  $5'UTR_{B7}$  strain. In two distinct experiments using 3 or 4  
300 separate cultures each, we observed a 19% and 13% average decrease in the *X. citri*  
301  $\Delta 5'UTR_{B7}$  *virB11-msfgfp* cell population relative to the wild-type *X. citri virB11-msfgfp* cell  
302 population (Figure 4a). Additionally, analysis of the cell sizes of the two strains at several  
303 time points over a one-week period revealed that the  $\Delta 5'UTR_{B7}$  background consistently has  
304 a slightly larger surface area over volume ratio (SA/V; Figure 4b), indicative of smaller cell  
305 sizes. The SA/V ratio has been suggested to be a measure of the physiological state of rod-  
306 shaped bacterial cells and is thought to be set by the availability of nutrients (Harris &  
307 Theriot 2016; Harris & Theriot 2018). The observed average size reduction (increase in SA/V)  
308 for *X. citri  $\Delta 5'UTR_{B7}$  virB11-msfgfp* cells could be attributed to the increased metabolic cost  
309 of nutrients consumed in T4SS production and/or to stress induced by the greater number  
310 of T4SSs in the cell envelope. This experiment reveals that T4SS production has a

311 measurable cost and illustrates the importance of balancing expenses with gains from  
312 increased aggressiveness during inter-bacterial competition.

313

## 314 Discussion

315 We show here that the regulation of the *virB* operon in *X. citri*, coding for the structural  
316 proteins of the T4SS, is under control of the global regulator CsrA which binds to sites in the  
317 5' untranslated region of the polycistronic mRNA initiating at the *virB7* gene (*5'UTR<sub>B7</sub>*; Figure  
318 1). The removal of the *5'UTR<sub>B7</sub>* leads to an increase in production of *virB* encoded proteins,  
319 which in turn leads to an increase in number of T4SSs present in the cell envelope and a  
320 greater interbacterial killing efficiency (Figure 2a, 2b and 2c). Despite CsrA repression on the  
321 *virB* operon, we have not yet found any growth condition that would greatly decrease nor  
322 increase T4SS production and T4SS-dependent killing by wild-type *X. citri* cells (Figures 2d,  
323 2e and 3a). Therefore, the removal of CsrA repression does not seem to be required to  
324 induce production of the T4SS. Rather, CsrA repression maintains a discrete number of  
325 T4SSs in the cell envelope over a range of different growth conditions tested (Figures 2 and  
326 3).

327 Several factors can be imagined influencing the efficiency with which a *X. citri* cell can  
328 mount a successful contact-dependent attack. Firstly, a T4SS needs to be present at the  
329 contact interface between the attacking *X. citri* cell and the target rival cell. After a  
330 successful contact, T4SS effectors need to be translocated through the T4SS. This is  
331 dependent on both the availability of effectors and importantly, ATP to power the secretion.  
332 For example, the subtle decrease in killing efficiencies in the sucrose-depleted conditions  
333 (Figure 2e) might stem from reduced energy levels, since sucrose would be the main  
334 carbohydrate fed into the glycolysis and citric acid metabolic pathways. Furthermore,  
335 depleting nutrients also leads to much smaller cell sizes compared to the cells grown in rich  
336 media (Harris & Theriot 2016). This reduction in cell size in itself could influence killing-  
337 efficiencies by increasing the probability of small cells contacting larger *E. coli* cells when in  
338 co-culture on a solid surface, since smaller *X. citri* cells will have a more close-packed  
339 arrangement next to *E. coli* cells (Hudson 1949), increasing the probabilities of successful  
340 T4SS contact. Expanding this line of reasoning, a unit mass of cells formed during growth in  
341 reduced nutrient conditions would have a higher contact probability as the same mass of

342 cells formed during growth in rich conditions, because of the former's greater number of  
343 single cells. Thus, the subtle increase in T4SS density with lower nutrient inputs (Figure 3b)  
344 and the concomitant smaller cell sizes, could both be responsible for the slight increases in  
345 killing efficiency in during growth in media depleted in both casamino acids and sucrose  
346 (Figure 2e).

347 The complex regulatory features governing CsrA production and activity have been shown  
348 to be orchestrated in response to a wide variety of signals (Yakhnin et al. 2011; Romeo &  
349 Babitzke 2018). Complex regulation mechanisms, including negative autoregulation, have  
350 been proposed to act to keep CsrA levels and activity relatively stable with greatly reduced  
351 cell-to-cell variability, making CsrA an ideal regulator for homeostatic responses (Yakhnin et  
352 al. 2011; Romeo & Babitzke 2018). Of note, an ancestral CsrA homolog has been shown to  
353 act as a homeostatic control agent during flagella morphogenesis in the Gram positive  
354 *Bacillus subtilis* (Mukherjee et al. 2011). As such, CsrA could integrate diverse signals that  
355 relay information regarding the nutritional environment of the cell and subsequently  
356 stabilise its own activity to ensure a constant regulatory effect on its target transcripts. In  
357 light of this model of CsrA function, our experiments do indeed indicate that in *X. citri*, CsrA  
358 acts to reduce production from the *virB* operon with roughly the same repressing power  
359 over a wide range of growth conditions (Figure 3a). Recently, it was reported that CsrA  
360 (RsmA) represses all three Type VI secretion systems in *Pseudomonas aeruginosa*, abolishing  
361 translation under non-inducing conditions (Allsopp et al. 2017). Affinity of RNA loops for  
362 CsrA can differ in several orders of magnitude (Duss et al. 2014) and so some CsrA-mRNA  
363 associations will be very sensitive to fluctuations in mRNA levels and CsrA availability while  
364 others remain insensitive. As such, CsrA-mRNA affinities could be tuned so as to  
365 constitutively stabilise translation from one transcript at basal levels (such as for the *virB*  
366 operon) and at the same time ensure that translation from other transcripts is only  
367 derepressed by a specific trigger; for example by a specific condition that changes the  
368 mRNA structure. Several genetic circuits leading to different outcomes are possible, but for  
369 sake of general discussion, we note that it is unlikely that CsrA availability varies greatly  
370 under different conditions, since this would be hard to reconcile with the simultaneous  
371 control of the hundreds of transcripts through which CsrA exerts its pleiotropic effects  
372 (Andrade et al. 2014; Potts et al. 2017).

373

374 The removal CsrA-based repression of T4SS production results in a two-fold increase in  
375 interspecies bacteria killing efficiency (Figure 2c) which could be beneficial under certain  
376 circumstances. However, the production of a T4SS has its costs: the maintenance and  
377 transcription of an approximately 13 kb locus, multiple rounds of translation to produce the  
378 over 100 subunits that need to be transported to the inner-membrane or periplasm and  
379 assembled into a single system of over 3 MDa in size (Low et al. 2014). Since the  
380 maintenance of a single gene and the production of the amino acids to build up its protein  
381 product has a measurable cost (Akashi & Gojobori 2002; Wagner 2005; Lynch & Marinov  
382 2015), it was not surprising that we were able detect a reduction in the fitness of the *X. citri*  
383 strain in which CsrA-based repression was removed (Figure 4).

384 Inter-bacterial competition is increasingly being shown to be crucial for the fitness, survival  
385 (Lories et al. 2017; García-Bayona & Comstock 2018), structuring of bacterial populations  
386 (Nadell et al. 2016) and possibly contributing to bacterial evolution by lysis and subsequent  
387 uptake of DNA (Veening & Blokesch 2017). The continuous expression and activity of the  
388 T4SS under different growth conditions, further illustrates the importance of interbacterial  
389 killing and the benefits that are accompanied with it. The control of *X. citri* T4SS production  
390 by CsrA, seems to guarantee constant densities of T4SSs that provide protection against rival  
391 bacteria, but not too many to represent a metabolic burden, thus maintaining a balance  
392 likely to be crucial for *X. citri* in the varied natural environments it encounters during its life  
393 cycle, both within and outside of its plant host.

394

## 395 Materials and Methods

396 Bacterial strains, media and culturing.

397 All strains used are listed in Supplemental Table S1. For all experiments, strains were grown  
398 in defined AB media containing 15mM (NH<sub>4</sub>)<sub>2</sub>SO<sub>4</sub>, 17mM Na<sub>2</sub>HPO<sub>4</sub>, 22mM KH<sub>2</sub>PO<sub>4</sub>, 50mM  
399 NaCl, 0.1 mM CaCl<sub>2</sub>, 1 mM MgCl<sub>2</sub> and 3 μM FeCl<sub>3</sub>, at pH 7.0, supplemented with 10 μg/mL  
400 thiamine and 25 μg/mL uracil and varying concentrations of carbohydrate sources and  
401 casamino acids as described in the text. For cloning purposes standard lysogeny broth (5g/l  
402 yeast, 5 g/l NaCl, 10 g/l tryptone and 15 g/l agar) and 2xYT (5 g/l yeast, 10 g/l NaCl, 16 g/l  
403 tryptone and 15 g/l agar) were used. For counterselection, sucrose plates were used (5 g/l

404 yeast, 10 g/l tryptone, 60 g/l sucrose). Standard incubations were performed at 28°C in 24-  
405 well plates using 1.5 ml culture media or in 96-well plates with 200 µl culture media with  
406 shaking at 200 rpm. In general, after a first overnight growth period in 2xYT medium, cells  
407 were transferred at a 100-fold dilution into AB defined media for a second overnight growth  
408 to synchronise growth. Cells were then diluted in fresh media and, after 4- to 6-hour growth,  
409 imaged by microscopy. In case of experiments involving different growth media  
410 compositions, cultures were inoculated once more at a 100-fold dilution in the appropriate  
411 AB media composition for overnight growth and a final re-inoculation in fresh media with  
412 dilutions ranging from 2-fold to 100-fold, depending on the overnight attained optical  
413 densities. Note that cultures grown under different nutrient conditions attained different  
414 densities after overnight growth. Care was therefore taken to dilute each culture in its  
415 appropriate media such as to obtain adequate numbers of cells for experimental assays but  
416 at the same time avoiding saturation of the faster growing cultures. After a final 4- to 9-hour  
417 growth period cells were either imaged with fluorescence microscopy or subjected to  
418 competition assays.

419 Cloning of constructs for genomic insertions and deletions.

420 All primers, plasmids and strains used for cloning and PCR verifications together with brief  
421 description of the constructions are listed in Supplemental Table S1. Genomic deletions and  
422 insertions in the *X. citri* genome were all constructed using a two-step allelic exchange  
423 procedure (Hmelo et al. 2015). For this, 500 to 1000 base pair-sized fragments up- and  
424 downstream from the region of interest were amplified using a high-fidelity polymerase  
425 (Phusion, Thermo Scientific) and cloned into the pNPTS138 vector either by traditional  
426 restriction digest cloning (NEB and Thermo Scientific) or by Gibson assembly (NEB). The  
427 resulting plasmid was used to transform the appropriate *X. citri* strain by electroporation  
428 (2.0 kV, 200 Ω, 25 µF, 0.2 cm cuvettes; Bio-Rad)(Sawitzke et al. 2011). A first recombination  
429 event was selected for on LB plates containing 50 µg/ml kanamycin. Transformants were  
430 streaked for single colonies on kanamycin plates whereafter several single colonies of the  
431 merodiploids (Kan<sup>R</sup>, Suc<sup>S</sup>) were streaked on sucrose plates selecting for a second  
432 recombination event creating either a wild-type or mutant allele. After confirmation of the  
433 loss of the kanamycin resistance cassette together with *sacB*, a PCR was performed using  
434 primers that hybridize outside of the homology regions to identify the target allele. Strains

435 containing the wild type alleles (revertants created at an equal rate during the second  
436 recombination event) were also stored and used as controls for their respective mutants. For  
437 the insertion of the pPM7G plasmid into the *amy* gene of *X. citri*, cells were electroporated  
438 with the pPM7G plasmid and selected for on LB plates containing 50 µg/ml kanamycin.  
439 Integrity of the *virB* operon in these strains was confirmed by PCR to exclude erroneous  
440 recombination with the pPM7G cloned 5'UTR<sub>B7</sub> regions.

441 Chlorophenol red-β-D-galactopyranoside (CPRG) bacterial competition assay.

442 To visualize and quantify the ability of *X. citri* to lyse *E. coli* strain MG1655, a CPRG-based  
443 method was used as described previously (Vettiger & Basler 2016; Sgro et al. 2018). Briefly,  
444 to each well of a clear U-shaped bottom 96-well plate, 100 µL of a mixture of 0.5 X buffer A  
445 (7.5mM (NH<sub>4</sub>)<sub>2</sub>SO<sub>4</sub>, 8.5mM Na<sub>2</sub>HPO<sub>4</sub>, 11mM KH<sub>2</sub>PO<sub>4</sub>, 25mM NaCl, pH 7.0), 1.5% agarose and  
446 40 µg/mL CPRG (Sigma-Aldrich) was added, and plates were thoroughly dried under a  
447 laminar flow. *X. citri* cells grown in the appropriate media, were mixed in a 1:1 volume ratio  
448 with a concentrated *E. coli* culture. The *E. coli* cultures were grown to OD<sub>600</sub> = 1 in the  
449 presence of 0.2 mM IPTG (inducing the *lac* operon) in 2xYT medium, washed once and  
450 concentrated 10 times. Five microliters of *X. citri* and *E. coli* mixtures were immediately  
451 added to the 96-well plate without puncturing or damaging the agarose, covered with a  
452 transparent seal and quickly thereafter absorbance at 572 nm (A<sub>572</sub>) was monitored over  
453 time in a 96-well plate reader for at least 200 minutes (SpectraMax Paradigm, Molecular  
454 Devices). The A<sub>572</sub> values were processed using RStudio software (RStudio-Team 2016) and  
455 plotted using the ggplot2 package (Wickham 2016). Background intensities obtained from  
456 the mean of A<sub>572</sub> values of non lysing *E. coli* cells were subtracted from the data series and  
457 data were normalized for initial OD<sub>600</sub> differences.

458 Fluorescence microscopy image acquisition and analysis.

459 Briefly, 1 µL of cell suspension was spotted on a thin agarose slab containing 1X buffer A  
460 (15mM (NH<sub>4</sub>)<sub>2</sub>SO<sub>4</sub>, 17mM Na<sub>2</sub>HPO<sub>4</sub>, 22mM KH<sub>2</sub>PO<sub>4</sub>, 50mM NaCl, pH 7) and 2% agarose and  
461 covered with a #1.5 cover glass (Corning). For time-lapse imaging, thicker agar slabs  
462 containing the appropriate media were constructed as described (Bayer-Santos et al. 2019).  
463 Phase contrast and msfGFP emission images were obtained with a Leica DMI-8  
464 epifluorescent microscope. msfGFP emissions were captured using 1000 to 1500 ms  
465 exposure times at maximum excitation light intensities. The microscope was equipped with a



466 DFC365 FX camera (Leica), a HC PL APO 100x/1.4 Oil ph3 objective (Leica) and a GFP  
467 excitation-emission band-pass filter cube (Ex.: 470/40, DC: 495, Em.: 525/50; Leica). For  
468 detection of VirB10-msfGFP foci, eleven 0.05  $\mu\text{m}$  Z-plane stacks were obtained from a 0.5  
469  $\mu\text{m}$  region within the centre of the cells. This allowed for a better signal to noise ratio of the  
470 VirB10-msfGFP foci and increased detection of VirB10-msfGFP foci location in different  
471 depths of the cell. These image stacks were background subtracted by a rolling ball  
472 correction using a significant cell-free portion of each image as a reference and, finally,  
473 combined by an average intensity projection using the FIJI software package (Schindelin et al.  
474 2012). To obtain a quantitative representation of cell sizes, background corrected  
475 fluorescence intensities and amount of foci present per cell, the images were analysed using  
476 the MicrobeJ software package (Ducret et al. 2016) and data was analysed by RStudio  
477 software (RStudio-Team 2016) and plotted using the ggplot2 package (Wickham 2016).

#### 478 Co-culture growth experiment

479 To illustrate the physiological burden associated with T4SS overexpression seven  
480 independent *X. citri*  $\Delta 5'UTR_{B7}$  *virB11-msfgfp* mutants and seven independent *X. citri* *virB11-*  
481 *msfgfp* strains (revertants to wild-type from the second recombination event), in two  
482 separate experiments, were grown overnight in 2xYT media, diluted 100-fold into defined AB  
483 media with 0.2% sucrose and 0.2% casamino acids and grown overnight. These overnight  
484 cultures were mixed 1:1 and 10-fold diluted into fresh AB media with 0.2% sucrose and 0.01%  
485 casamino acids. Immediately after mixing (at timepoint 0h) fluorescence microscopy images  
486 were taken (as described above) to register the exact ratio of *X. citri* *virB11-msfgfp* cells  
487 versus *X. citri*  $\Delta 5'UTR_{B7}$  *virB11-msfgfp* cells. The cultures were subsequently diluted regularly  
488 so to prevent cultures from reaching saturation which would halt further cell division. At the  
489 indicated time-points several microscopy images of each of the co-cultures were again  
490 acquired. Given that the *virB11-msfgfp* reporter in the strain lacking the  $5'UTR_{B7}$  has a higher  
491 msfGFP production (histograms of the populations' msfGFP fluorescence levels do not  
492 overlap), cells could be sorted by using average msfGFP content and as such, an accurate  
493 quantification of the cell ratio between wild-type and deleted  $5'UTR_{B7}$  strains could be  
494 calculated over time.

#### 495 Transcription start site analysis

496 Transcriptional start sites of the *virD* and *virB* transcripts were obtained by using the 5' RACE  
497 Kit (Roche), as described (Andrade et al. 2014). The oligos for *virD4* and *virB7* 5' RACE assays  
498 are listed in Supplemental Table S1. The resulting PCR fragments were blunt ligated into  
499 pGEM-T before sequencing 3 independent clones, identifying the transcription start sites.

#### 500 RNA electromobility shift assays

501 For the RNA electromobility shift assays, DNA fragments encoding either the entire 5' UTR  
502 of the *virB* operon or a shortened fragment lacking the first 73 nucleotides ( $\Delta 1-73$ nt), were  
503 amplified from *X. citri* genome using forward primers which include the T7 promoter  
504 sequence (see Supplemental Table S1). RNA transcripts of the cloned 5'UTR<sub>B7</sub> fragments  
505 were produced *in vitro* from the resulting purified PCR products by using the T7  
506 Transcription kit (Roche) and labeled by using the RNA 3' end biotinylation kit (Pierce). The  
507 CsrA recombinant protein was purified as previously described (Andrade et al. 2014).  
508 Approximately 70 nM of purified CsrA protein and 6.25 nM Biotin-labeled RNA were mixed  
509 with binding buffer [(10 mM HEPES pH 7.3, 20 mM KCl, 1mM MgCl<sub>2</sub>, 1 mM DTT, 5% glycerol,  
510 0.1  $\mu$ g/ $\mu$ L yeast tRNA, 20 U RNasin (Promega)] in a total reaction volume of 20  $\mu$ L. The  
511 binding reactions were incubated at 25°C for 20 min. A 5  $\mu$ L aliquot of loading buffer (97%  
512 glycerol, 0.01% bromophenol blue, 0.01% xylene cyanol) was added to the binding reaction  
513 and immediately loaded and resolved by 5% native polyacrylamide gels. The binding assays  
514 and detection of RNA products were performed with the LightShift Chemiluminescent RNA  
515 EMSA Kit (Thermo Scientific). For the control reactions, 312.5 nM competitor unlabeled RNA  
516 of the *virB* 5'UTR<sub>B7</sub> was added to the binding reactions.

517

#### 518 Acknowledgments

519 We thank Alexandre Bruni-Cardoso for unlimited access to the Leica DMI8 microscope.  
520 Special thanks to Ioannis Passaris and Sander K. Govers for very helpful discussions,  
521 suggestions and critical reading of the manuscript, and to Gilberto Kaihami for the  
522 introduction to the R programming language. This work was supported by a FAPESP post-  
523 doctoral grant to William Cenens (2015/18237-2) and FAPESP research grants to Chuck S.  
524 Farah (2011/07777-5 and 2017/17303-7).

525

## 526 References

- 527 Akashi, H. & Gojobori, T., 2002. Metabolic efficiency and amino acid composition in the  
528 proteomes of *Escherichia coli* and *Bacillus subtilis*. *Proceedings of the National*  
529 *Academy of Sciences*, 99(6), pp.3695–3700.
- 530 Alkhateeb, R.S. et al., 2016. Genome wide transcription start sites analysis of *Xanthomonas*  
531 *campestris* pv. *campestris* B100 with insights into the gum gene cluster directing the  
532 biosynthesis of the exopolysaccharide xanthan. *Journal of biotechnology*, 225, pp.18–  
533 28.
- 534 Allsopp, L.P. et al., 2017. RsmA and AmrZ orchestrate the assembly of all three type VI  
535 secretion systems in *Pseudomonas aeruginosa*. *Proceedings of the National Academy of*  
536 *Sciences of the United States of America*, 114(29), pp.7707–7712.
- 537 Andrade, M.O., Farah, C.S. & Wang, N., 2014. The Post-transcriptional Regulator rsmA/csrA  
538 Activates T3SS by Stabilizing the 5' UTR of hrpG, the Master Regulator of hrp/hrc  
539 Genes, in *Xanthomonas* W. Ma, ed. *PLoS Pathogens*, 10(2), p.e1003945.
- 540 Baker, C.S. et al., 2002. CsrA regulates glycogen biosynthesis by preventing translation of  
541 glgC in *Escherichia coli*. *Molecular Microbiology*, 44(6), pp.1599–1610.
- 542 Bayer-Santos, E. et al., 2019. The opportunistic pathogen *Stenotrophomonas maltophilia*  
543 utilizes a type IV secretion system for interbacterial killing. *bioRxiv*, p.557322.
- 544 Bayer-Santos, E. et al., 2018. *Xanthomonas citri* T6SS mediates resistance to *Dictyostelium*  
545 predation and is regulated by an ECF  $\sigma$  factor and cognate Ser/Thr kinase.  
546 *Environmental Microbiology*, 20(4), pp.1562–1575.
- 547 Borgeaud, S. et al., 2015. The type VI secretion system of *Vibrio cholerae* fosters horizontal  
548 gene transfer. *Science*, 347(6217), pp.63–67.
- 549 Boschioli, M.L. et al., 2002. The *Brucella suis* virB operon is induced intracellularly in  
550 macrophages. *Proceedings of the National Academy of Sciences*, 99(3), pp.1544–1549.
- 551 Chao, N.-X. et al., 2008. The rsmA-like Gene rsmA Xcc of *Xanthomonas campestris* pv.  
552 *campestris* Is Involved in the Control of Various Cellular Processes, Including  
553 Pathogenesis. *Molecular Plant-Microbe Interactions*, 21(4), pp.411–423.
- 554 Das, A. & Pazour, P.J., 1989. Delineation of the regulatory region sequences of  
555 *Agrobacterium tumefaciens* virB operon. *Nucleic Acids Research*, 17(12), pp.4541–

- 556 4550.
- 557 Dehio, C. & Tsolis, R.M., 2017. Type IV effector secretion and subversion of host functions by  
558 bartonella and brucella species. In *Current Topics in Microbiology and Immunology*.  
559 Springer, Cham, pp. 269–295.
- 560 Ducret, A., Quardokus, E.M. & Brun, Y. V., 2016. MicrobeJ, a tool for high throughput  
561 bacterial cell detection and quantitative analysis. *Nature Microbiology*, 1(7), p.16077.
- 562 Duss, O. et al., 2014. Molecular basis for the wide range of affinity found in Csr/Rsm protein-  
563 RNA recognition. *Nucleic Acids Research*, 42(8), pp.5332–5346.
- 564 Gao, R. & Lynn, D.G., 2005. Environmental pH sensing: Resolving the VirA/VirG two-  
565 component system inputs for *Agrobacterium* pathogenesis. *Journal of Bacteriology*,  
566 187(6), pp.2182–2189.
- 567 García-Bayona, L. & Comstock, L.E., 2018. Bacterial antagonism in host-associated microbial  
568 communities. *Science*, 361(6408), p.eaat2456.
- 569 Gordon, J.E. & Christie, P.J., 2014. The *Agrobacterium* Ti Plasmids. *Microbiology Spectrum*,  
570 2(6), pp.1–18.
- 571 Harris, L.K. & Theriot, J.A., 2016. Relative Rates of Surface and Volume Synthesis Set  
572 Bacterial Cell Size. *Cell*, 165(6), pp.1479–1492.
- 573 Harris, L.K. & Theriot, J.A., 2018. Surface Area to Volume Ratio: A Natural Variable for  
574 Bacterial Morphogenesis. *Trends in Microbiology*, 26(10), pp.815–832.
- 575 Hayashi, K. et al., 2006. Highly accurate genome sequences of *Escherichia coli* K-12 strains  
576 MG1655 and W3110. *Molecular Systems Biology*, 2, p.2006.0007.
- 577 Hmelo, L.R. et al., 2015. Precision-engineering the *Pseudomonas aeruginosa* genome with  
578 two-step allelic exchange. *Nature protocols*, 10(11), pp.1820–41.
- 579 Holmqvist, E. et al., 2016. Global RNA recognition patterns of post-transcriptional regulators  
580 Hfq and CsrA revealed by UV crosslinking in vivo. *The EMBO journal*, 35(9),  
581 p.e201593360.
- 582 Hudson, D.R., 1949. Density and Packing in an Aggregate of Mixed Spheres. *Journal of*  
583 *Applied Physics*, 20(2), pp.154–162.
- 584 Ilangovan, A., Connery, S. & Waksman, G., 2015. Structural biology of the Gram-negative  
585 bacterial conjugation systems. *Trends in microbiology*, 23(5), pp.301–310.
- 586 Janssen, K.H. et al., 2018. *Functional analyses of the RsmY and RsmZ small noncoding*  
587 *regulatory RNAs in Pseudomonas aeruginosa*,

- 588 Ke, N. et al., 2016. Visualization of periplasmic and cytoplasmic proteins with a self-labeling  
589 protein tag. *Journal of Bacteriology*, 198(7).
- 590 Koraimann, G. & Wagner, M.A., 2014. Social behavior and decision making in bacterial  
591 conjugation. *Frontiers in Cellular and Infection Microbiology*, 4(April), pp.1–7.
- 592 Liu, M.Y. & Romeo, T., 1997. The global regulator CsrA of *Escherichia coli* is a specific mRNA-  
593 binding protein. *Journal of bacteriology*, 179(14), pp.4639–42.
- 594 Lohrke, S.M., Yang, H. & Jin, S., 2001. Reconstitution of *Acetosyringone*-mediated  
595 *Agrobacterium tumefaciens* virulence gene expression in the heterologous host  
596 *Escherichia coli*. *Journal of Bacteriology*, 183(12), pp.3704–3711.
- 597 Lories, B. et al., 2017. Meeting report on the ASM Conference on Mechanisms of  
598 Interbacterial Cooperation and Competition. *Journal of Bacteriology*, p.JB.00403-17.
- 599 Low, H.H. et al., 2014. Structure of a type IV secretion system. *Nature*, 508(7497), pp.550–  
600 553.
- 601 Lu, X.H. et al., 2012. RsmA Regulates Biofilm Formation in *Xanthomonas campestris* through  
602 a Regulatory Network Involving Cyclic di-GMP and the Clp Transcription Factor. *PLoS*  
603 *ONE*, 7(12), pp.1–11.
- 604 Lynch, M. & Marinov, G.K., 2015. The bioenergetic costs of a gene. *Proceedings of the*  
605 *National Academy of Sciences*, 112(51), p.201514974.
- 606 Mansfield, J. et al., 2012. Top 10 plant pathogenic bacteria in molecular plant pathology.  
607 *Mol Plant Pathol*, 13(6), pp.614–629.
- 608 Marteyn, B. et al., 2010. Modulation of *Shigella* virulence in response to available oxygen in  
609 vivo. *Nature*, 465(7296), pp.355–358.
- 610 Martins, P.M.M. et al., 2010. Subcellular localization of proteins labeled with GFP in  
611 *Xanthomonas citri* ssp. *citri*: Targeting the division septum. *FEMS Microbiology Letters*,  
612 310(1), pp.76–83.
- 613 Moumène, A. et al., 2017. Iron Starvation Conditions Upregulate *Ehrlichia ruminantium*  
614 Type IV Secretion System, tr1 Transcription Factor and map1 Genes Family through the  
615 Master Regulatory Protein ErxR. *Frontiers in Cellular and Infection Microbiology*, 7,  
616 p.535.
- 617 Mukherjee, S. et al., 2011. CsrA-FliW interaction governs flagellin homeostasis and a  
618 checkpoint on flagellar morphogenesis in *Bacillus subtilis*. *Molecular Microbiology*,  
619 82(2), pp.447–461.

- 620 Nadell, C.D., Drescher, K. & Foster, K.R., 2016. Spatial structure, cooperation and  
621 competition in biofilms. *Nature Reviews Microbiology*, 14(9), pp.589–600.
- 622 Potts, A.H. et al., 2017. Global role of the bacterial post-transcriptional regulator CsrA  
623 revealed by integrated transcriptomics. *Nature Communications*, 8(1), p.1596.
- 624 Romeo, T. & Babitzke, P., 2018. Global Regulation by CsrA and Its RNA Antagonists.  
625 *Microbiology Spectrum*, 6(2), pp.1–14.
- 626 RStudio-Team, 2016. RStudio: Integrated Development for R. *RStudio, Inc., Boston, MA*.  
627 Available at: <http://www.rstudio.com/>.
- 628 Ryan, R.P. et al., 2011. Pathogenomics of *Xanthomonas*: understanding bacterium–plant  
629 interactions. *Nature Reviews Microbiology*, 9(5), pp.344–355.
- 630 Sawitzke, J.A. et al., 2011. Probing cellular processes with oligo-mediated recombination  
631 and using the knowledge gained to optimize recombineering. *Journal of molecular*  
632 *biology*, 407, pp.45–59.
- 633 Schindelin, J. et al., 2012. Fiji: An open-source platform for biological-image analysis. *Nature*  
634 *Methods*, 9(7), pp.676–682.
- 635 Sgro, G.G. et al., 2019. Bacteria-killing Type IV Secretion Systems. *Frontiers in Microbiology*,  
636 10, p.1078.
- 637 Sgro, G.G. et al., 2018. Cryo-EM structure of the bacteria-killing type IV secretion system  
638 core complex from *Xanthomonas citri*. *Nature Microbiology*, p.1.
- 639 da Silva, A.C.R. et al., 2002. Comparison of the genomes of two *Xanthomonas* pathogens  
640 with differing host specificities. *Nature*, 417(6887), pp.459–463.
- 641 Souza, D.P. et al., 2015. Bacterial killing via a type IV secretion system. *Nature*  
642 *Communications*, 6, pp.1–9.
- 643 Veening, J.-W. & Blokesch, M., 2017. Interbacterial predation as a strategy for DNA  
644 acquisition in naturally competent bacteria. *Nature Reviews Microbiology*, 15(10),  
645 pp.621–629.
- 646 Vergunst, A.C. et al., 2000. VirB / D4-Dependent Protein Translocation from *Agrobacterium*  
647 into Plant Cells. *Science*, 290(November), pp.979–982.
- 648 Vettiger, A. & Basler, M., 2016. Type VI Secretion System Substrates Are Transferred and  
649 Reused among Sister Cells. *Cell*, 167(1), p.99–110.e12.
- 650 Wagner, A., 2005. Energy constraints on the evolution of gene expression. *Molecular*  
651 *Biology and Evolution*, 22(6), pp.1365–1374.

652 Weilbacher, T. et al., 2003. A novel sRNA component of the carbon storage regulatory  
653 system of Escherichia coli. *Molecular Microbiology*, 48(3), pp.657–670.  
654 Wickham, H., 2016. *ggplot2: Elegant Graphics for Data Analysis*, Springer-Verlag New York.  
655 Winans, S.C., 1990. Transcriptional induction of an Agrobacterium regulatory gene at  
656 tandem promoters by plant-released phenolic compounds, phosphate starvation, and  
657 acidic growth media. *Journal of Bacteriology*, 172(5), pp.2433–2438.  
658 Yakhnin, H. et al., 2011. Complex regulation of the global regulatory gene *csrA*: CsrA-  
659 mediated translational repression, transcription from five promoters by Eσ70 and EσS,  
660 and indirect transcriptional activation by CsrA. *Molecular microbiology*, 81(3), pp.689–  
661 704.  
662

## 663 [Supplementary File Legends](#)

664 **Supplemental Table S1:** Primers, strains and plasmids used in this study

665

666 **Supplemental Figure S1:** 5'RACE assay identifying the transcription start sites for *virD4* and  
667 *virB7*. **a)** bottom panel shows the two adjacent possible transcription start sites of *virD4* (red  
668 and purple arrow) due to sequencing ambiguity. The possible start sites are indicated with a  
669 purple G and a red C in the nucleotide sequence (top panel). *VirD4* sequence starts at the  
670 end of the displayed nucleotide sequence. In between the TSS and *virD4* a putative ORF of  
671 unknown function is present. **b)** Similar analysis for *virB7* with start site depicted with red  
672 arrow (bottom panel) and red G in the nucleotide sequence (top panel). In panel a and b,  
673 translation start sites are depicted in red and open reading frames in blue. In bold are the  
674 putative polymerase binding sites and in underlined regular font the ribosome binding sites.  
675

676 **Supplemental Movie S1:** Time-lapse movie showing contact dependent lysis at the single-  
677 cell level during growth in media depleted for casamino acids. Movie starts after 25 hours of  
678 growth on the pad. Clearly showing greatly decreased growth speeds. White arrows indicate  
679 regions where *E. coli* cells come into contact with the smaller sized *X. citri* cells. Scalebar  
680 indicates 5µm. Timestamp in bottom left of the movie.

681

682 **Supplemental Movie S2:** Time-lapse movie showing contact dependent lysis at the single-  
683 cell level during growth in rich media. Movie was started and ran in parallel with Movie S1.  
684 Starting at timepoint zero. White arrows indicate regions where *E. coli* cells come into contact  
685 with smaller sized *X. citri* cells. Scalebar indicates 5 $\mu$ m. Timestamp in bottom left of the  
686 movie.  
687  
688



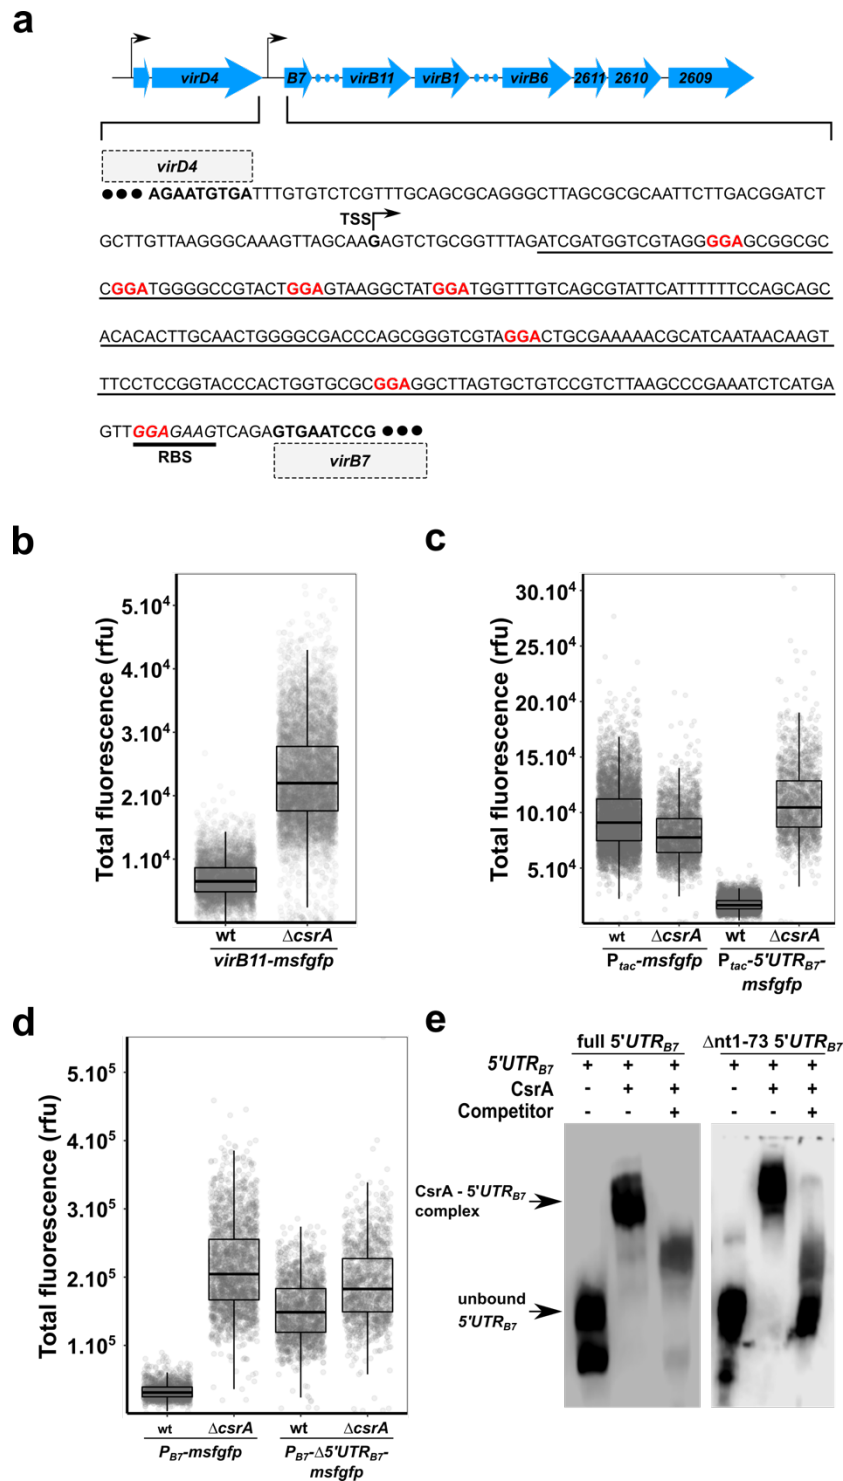

689

690 Figure 1: *CsrA* regulates the *virB* operon. **a**) An on-scale schematic of the *virD* and *virB* operons with black arrows  
 691 indicating positions of the transcription start sites, blue arrows indicating the open reading frames and blue dots  
 692 representing genes not shown. The intergenic sequence between *virD4* and *virB7* genes is shown and the *virB7*  
 693 transcription start site (TSS) is indicated. The 5'-GGA-3' motifs are indicated in red and the predicted ribosome binding site  
 694 (RBS) is underlined with a thick black line. The sequence that is deleted in the  $\Delta 5'UTR_{B7}$  strains is underlined with a thin  
 695 black line. **b**) Single-cell msfGFP fluorescence levels of the *X. citri virB11-msfgfp* transcriptional reporter in *X. citri* wild type  
 696 and  $\Delta csrA$  strains. Production of msfGFP increased on average 3.3-fold in the  $\Delta csrA$  strain ( $N_{wt} = 4887$  cells and  $N_{\Delta csrA} =$   
 697 6263 cells, from a single representative culture each). **c**) Single-cell msfGFP fluorescence levels of the *amy::P<sub>tac</sub>-msfgfp* and

698 *amy::P<sub>toc</sub>-5'UTR<sub>B7</sub>-msfgfp* reporters in *X. citri* wild type and  $\Delta$ *csrA* strains. A CsrA-dependent reduction in msfGFP  
699 production is only observed in the strain containing the 5'UTR<sub>B7</sub> (average 5.8-fold reduction, N<sub>wt</sub> = 6862 cells and N <sub>$\Delta$ csrA</sub> =  
700 1671 cells, from 2 separate cultures each). The control lacking the 5'UTR<sub>B7</sub> in between the P<sub>toc</sub> promotor and *msfgfp* (*X.citri*  
701 *amy::P<sub>toc</sub>-msfgfp*) showed no CsrA-dependent repression of msfGFP production (average 16% increase, N<sub>wt</sub> = 5534 cells and  
702 N <sub>$\Delta$ csrA</sub> = 2495 cells, from 2 separate cultures each). **d)** Single-cell msfGFP fluorescence levels of the *msfgfp* reporter that  
703 substituted the entire structural *virB* operon (with the *msfgfp* start codon placed at the exact position of the *virB7* start  
704 codon) in *X. citri* wild type and  $\Delta$ *csrA* strains with an intact *virB* promoter (P<sub>B7</sub>) or a *virB* promoter in which the 5'UTR<sub>B7</sub> was  
705 deleted (P<sub>B7</sub>- $\Delta$ 5'UTR<sub>B7</sub>). *X. citri*  $\Delta$ *virB*::P<sub>B7</sub>- $\Delta$ 5'UTR<sub>B7</sub>-*msfgfp* shows higher msfGFP production than the *X. citri*  $\Delta$ *virB*::P<sub>B7</sub>-  
706 *msfgfp* strain containing the wild type 5'UTR<sub>B7</sub> (average 6.5-fold increase, N<sub>wt</sub> = 1495 cells and N <sub>$\Delta$ csrA</sub> = 2156 cells, from 2  
707 separate cultures each). Absence of the 5'UTR<sub>B7</sub> almost completely abolishes CsrA dependent down-regulation of  
708 expression levels (average 1.2-fold increase, N<sub>wt</sub> = 1748 cells and N <sub>$\Delta$ csrA</sub> = 1304 cells, from 2 separate cultures each). Note  
709 that removal of the 5'UTR<sub>B7</sub> in the wild-type backgrounds led to a 4.6-fold increase. **e)** An electrophoresis mobility shift  
710 assay (EMSA) shows direct *in vitro* binding of CsrA with the complete and a shortened fragment (lacking the first 73  
711 nucleotides) of the 5'UTR<sub>B7</sub>. Addition of unlabelled 5'UTR<sub>B7</sub> RNA competes with labelled RNA binding. Tukey box-and-  
712 whisker plots in parts b, c and d: black central line (median), box (first and third quartiles) and whiskers (data within 1.5  
713 interquartile range).

714

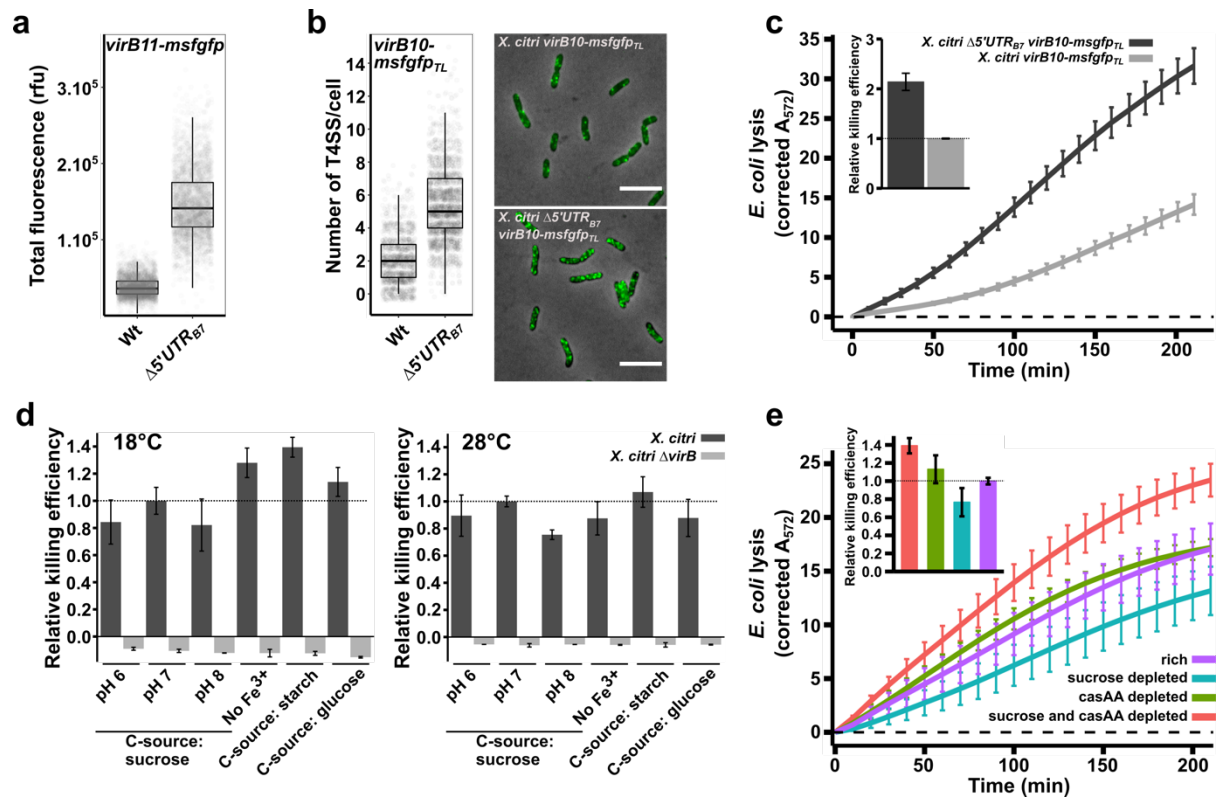

715

716

717

718

719

720

721

722

723

724

725

726

727

728

729

730

731

732

733

734

735

736

737

738

739

**Figure 2: VirB production and interbacterial killing is constitutive under incomplete repression by CsrA.** **a)** Single-cell msfGFP fluorescence levels from the *X. citri virB11-msfgfp* reporter strain with and without the genomic deletion of the *5'UTR<sub>B7</sub>* (underlined region in Figure 1a; *X. citri Δ5'UTR<sub>B7</sub> virB11-msfgfp*). Removing the *5'UTR<sub>B7</sub>* leads to a 3.9-fold increase in msfGFP production from the *virB* operon ( $N_{wt} = 3397$  cells and  $N_{Δ5'UTR} = 3099$  cells, from 4 separate cultures). **b)** Quantification of single fluorescent foci of T4SSs containing the VirB10-msfGFP chimera. The genomic deletion of the *5'UTR<sub>B7</sub>* in the *X. citri virB10-msfgfp<sub>TL</sub>* strain increased the number of T4SSs per cell 2.6-fold ( $N_{wt} = 1361$  cells and  $N_{Δ5'UTR} = 2062$  cells, from 3 separate cultures). Note that the increased amount of T4SS in the *Δ5'UTR<sub>B7</sub>* strain in some cases causes the VirB10-msfGFP produced fluorescent foci to overlap, limiting the separation of the single foci, leading to an underestimation of the number of T4SS per cell. **c)** Quantitative CPRG cleavage-based killing assay in the presence or absence of CsrA repression on the *virB* operon using the same *X. citri virB10-msfgfp<sub>TL</sub>* and *X. citri Δ5'UTR<sub>B7</sub> virB10-msfgfp<sub>TL</sub>* cultures analysed in part **b**. Genomic deletion of the *5'UTR<sub>B7</sub>* leads to a 2.14-fold increase in lysis of *E. coli* cells. The inset shows the slope value of the linear part of the depicted curves relative to the wild-type strains ( $N = 4$  separate cultures with 2 technical repeats each). **d)** Quantitative CPRG cleavage-based killing assays of wild type *X. citri* cells grown in different conditions (dark grey bars). Killing efficiencies were evaluated in defined media containing different carbohydrate sources (0.2 % sucrose, 50 μg/ml starch or 0.2% glucose), pH 6, 7 and 8, lack of Fe<sup>3+</sup> and at different temperatures (18°C and 28°C). Values represent the slope of the linear part of the OD<sub>572</sub> curves as described in panel **c** and normalized relative to the condition at pH 7 (which is the condition used throughout the manuscript). As a control, killing efficiency of a T4SS-deficient mutant (*X. citri ΔvirB::P<sub>B7</sub>-msfgfp*; light grey bar) was assessed after growth under the same conditions ( $N = 4$  separate cultures with two technical repeats). **e)** Quantitative CPRG cleavage-based killing assays from *X. citri* cells grown at different nutrient levels. Killing efficiencies of wild type *X. citri* strains are maintained during growth in defined media containing either 0.2% or 0.01% sucrose and/or casamino acids (casAA). Inset shows the slope value of the linear part of the depicted curves relative to the killing curve from the *X. citri* cultures grown in rich media. Cultures reduced in both casamino acid and sucrose concentrations show a 39% increase whereas sucrose depleted cultures have a 23% reduction in efficiencies compared to the reference ( $N = 5$  separate cultures with 4 technical repeats). Error bars in panels **c**, **d** and **e**

740 indicate the standard deviation. Horizontal dashed line in c and e represents the zero-line obtained after subtracting the  
741 background signal of non-lysed *E. coli* cultures grown in parallel during each experiment.  
742

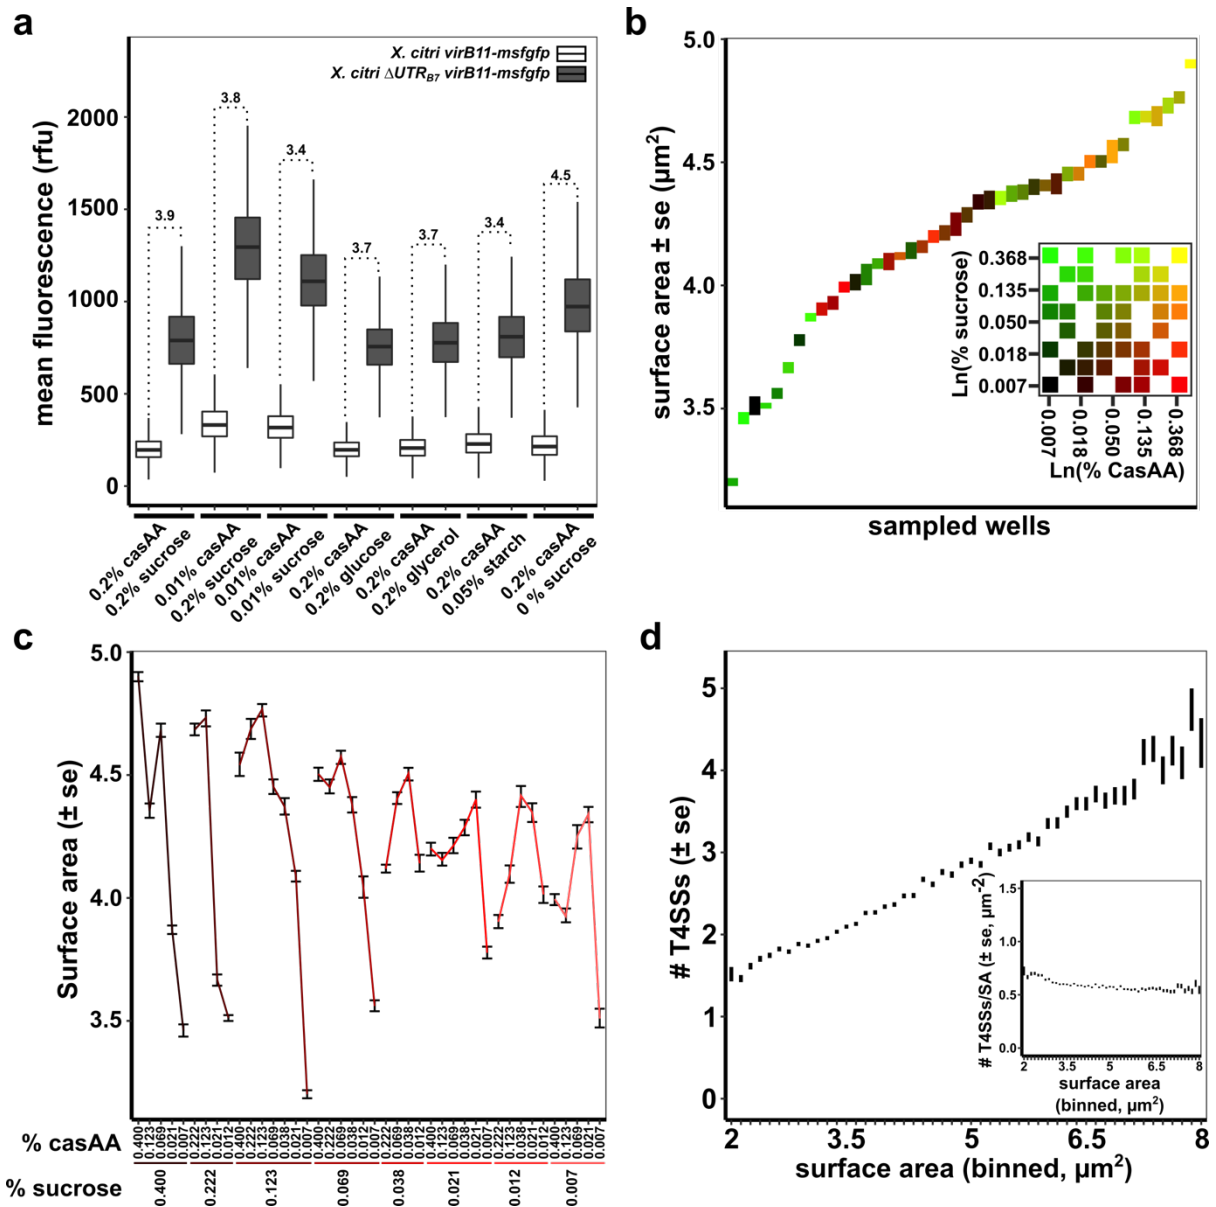

743

744

745

746

747

748

749

750

751

752

753

754

755

756

757

Figure 3: T4SS production and density in the cell envelope under different nutrient conditions. **a**) msfGFP fluorescence levels from *X. citri virB11-msfgfp* and *X. citri Δ5'UTR<sub>B7</sub> virB11-msfgfp* grown in AB defined media containing either sucrose, glucose, glycerol, starch or no carbohydrate source (0% sucrose) in combination with 0.2% casamino acids (casAA) or in AB defined media containing 0.01% casamino acids with 0.2% or 0.01% sucrose. Mean cytoplasmic msfGFP production from the *X. citri virB11-msfgfp* transcriptional fusion strain in the presence (white boxplots) or absence (grey boxplots) of the 5'UTR<sub>B7</sub> are represented as Tukey box-and-whisker plots for each media composition with black central line (median), box (first and third quartiles) and whiskers (data within 1.5 interquartile range). On average 6,018 cells were sampled per condition for each strain, with a minimum of 2,162 and a maximum of 16,351 cells from two independent cultures. Note that in this graph, the mean fluorescence (sum of each cell's pixel intensities divided by the number of pixels) is used to take into account differences in cell-sizes between conditions. **b**) Surface area of *X. citri* cells sampled from separate cultures, each culture differing slightly in sucrose and casamino acid concentrations. Cultures are ordered according to the average cell surface area observed for each growth condition. The inset shows the 8x8 matrix range of sucrose and casamino acid concentrations used as described in the text. In both the graph and the inset, each growth condition is colored differently. **c**) Surface area of *X. citri* cells as a function of sucrose and casamino acid concentrations. The data is

758 the same as in panel b but organised with respect to sucrose and casamino acid concentrations and illustrates the link  
759 between *X. citri* cell sizes and the culture media. **d)** Average number of T4SSs per cell versus cell surface area from all the  
760 cells grown in the different conditions presented in panels b and c. Detection of VirB10-msfGFP foci reveals that the  
761 increase of average number of T4SSs correlates with increasing surface area (Pearson correlation  $r = 0.34$ , as calculated for  
762 all data points). *Inset*: Density of T4SSs in the cell envelope (number of T4SS per surface area, T4SS/SA) versus the surface  
763 area. A subtle increase with smaller (and thus more nutrient deprived) cells is observed. Vertical bars in figure b, c and d  
764 represent the standard error around the mean ( $\pm$  se). In total 69,412 cells were registered for the data in panels b, c and d.  
765

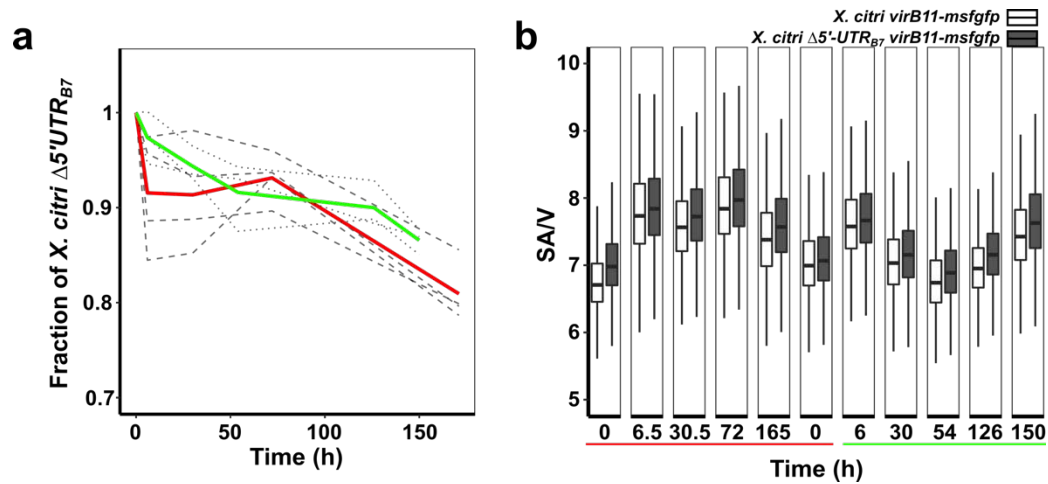

766

767

768 Figure 4: **Overproducing T4SSs leads to a detectable physiological cost for *X. citri*.** a) Co-culture experiment between *X.*

769 *citri virB11-msfGFP* and *X. citri*  $\Delta 5'UTR_{B7}$  *virB11-msfGFP* in liquid medium. A decrease in the fraction of *X. citri*  $\Delta 5'UTR_{B7}$

770 *virB11-msfGFP* cells relative to the wild-type (*X. citri virB11-msfGFP*) cells is observed and becomes pronounced after

771 approximately 1-week incubation. Results from two distinct experiments with 3 (dotted lines and green average) and 4

772 (dashed lines and red average) separate cultures are shown. In all seven cultures, we observed a significant reduction in

773 the fraction of *X. citri*  $\Delta 5'UTR_{B7}$  *virB11-msfgfp* cells relative to the wild-type *X. citri virB11-msfgfp* cells at the end-points:

774  $0.87 \pm 0.01$  (green) and  $0.81 \pm 0.03$  (red). Cells were imaged by fluorescence microscopy and separated by the difference in

775 *msfGFP* production levels as seen in Figures 2a and 3a. b) Comparison of surface area to volume ratios of *X. citri*  $\Delta 5'UTR_{B7}$

776 *virB11-msfGFP* and wild-type cells for cells collected at different times for all seven cultures shown in part a. A subtle but

777 consistently smaller average cell size (larger SA/V) in the  $\Delta 5'UTR_{B7}$  background is observed indicative of a subtle change in

778 physiological state of the cells that can be attributed to the increased production of T4SSs. At each time point an average

779 of 3871 cells were analysed for each culture (minimum: 1061 cells, maximum: 9582 cells).

780
